# Supplementary material for: CompreHensive geriAtRician-led MEdication Review (CHARMER): protocol for a feasibility study of a hospital deprescribing behaviour change intervention
Source: HighWire-hosted journal article supplement (doi:10.1136/bmjopen-2023-075795), 2023-08-01
Supplement: bmjopen-2023-075795supp002_data_supplement.pdf [file bmjopen-2023-075795supp002_data_supplement.pdf]

**Supplementary file 2: Detailed overview of outcome measures**

| Outcome                                                                                                                                                                        | Data source/measure                                                                                                                                  | Frequency of collection                   | Method of collection                   |
|--------------------------------------------------------------------------------------------------------------------------------------------------------------------------------|------------------------------------------------------------------------------------------------------------------------------------------------------|-------------------------------------------|----------------------------------------|
| <i>Patient-orientated outcomes</i>                                                                                                                                             |                                                                                                                                                      |                                           |                                        |
| <b>All patients on study ward during active study window</b>                                                                                                                   |                                                                                                                                                      |                                           |                                        |
| <b>Mortality (secondary outcome measure)</b><br>The death of a patient for any reason                                                                                          | Death certificate data from the ONS*                                                                                                                 | Once at 90 days post discharge            | Routine hospital data                  |
| <b>Number of hospital stays (secondary outcome measure)</b><br>The number of planned and unplanned admissions and re-admissions to hospital for treatment or monitoring health | HES* Admitted Patient Care dataset from NHS Digital and Site Medical Record                                                                          | Once at 90 days post discharge            | Routine hospital data                  |
| <b>Patients providing consent/consultee assent for enhanced data collection activities</b>                                                                                     |                                                                                                                                                      |                                           |                                        |
| <b>Satisfaction with deprescribing</b>                                                                                                                                         | A 13-item questionnaire capturing satisfaction with the procedures associated with any medicines that may have been stopped during the hospital stay | Once, as soon as possible after discharge | Patient/consultee reported (telephone) |
| <b>Medication related adverse events</b>                                                                                                                                       | A 18-item questionnaire to capture presence or absence of symptoms in the one month prior to assessment                                              | Once at 90 days post discharge            | Patient/consultee reported (telephone) |

|                                                                                                                                                                                        |                                                                                  |                                                    |                                        |
|----------------------------------------------------------------------------------------------------------------------------------------------------------------------------------------|----------------------------------------------------------------------------------|----------------------------------------------------|----------------------------------------|
| <b>Quality of life (secondary outcome measure)</b><br>The standard of health, comfort and happiness experienced by an individual, including quality of life relating to medication use | EuroQoL 5-dimension questionnaire (EQ-5D-5L), Short Form 36 Health Survey (SF36) | Twice – at discharge and at 90 days post discharge | Patient/consultee reported (telephone) |
| <b>Economic outcomes</b>                                                                                                                                                               |                                                                                  |                                                    |                                        |
| <b>All patients on study ward during active study window</b>                                                                                                                           |                                                                                  |                                                    |                                        |
| <b>Number of hospital stays</b><br>The number of planned and unplanned admissions and re-admissions to hospital for treatment or monitoring health                                     | HES Admitted Patient Care dataset from NHS Digital                               | Once, at 90 days post discharge                    | Routine hospital data                  |
| <b>Length of hospital stay for index admission</b><br>The number of days                                                                                                               | Site Medical Record                                                              | Once, at discharge from hospital                   |                                        |
| <b>Patients providing consent/consultee assent for enhanced data collection activities</b>                                                                                             |                                                                                  |                                                    |                                        |
| <b>Number of primary care consultations</b><br>The number of consultations with General Practitioners or Practice Nurse for treatment or monitoring health                             | GP records                                                                       | Once, at 6 weeks post discharge                    | Routine primary care data              |
| <b>Process outcomes</b>                                                                                                                                                                |                                                                                  |                                                    |                                        |
| <b>All patients on study ward during active study window</b>                                                                                                                           |                                                                                  |                                                    |                                        |
| <b>Number of regularly prescribed medicines at discharge</b>                                                                                                                           | Site Medical Record                                                              | Once, at the point of discharge                    | Routine hospital data                  |

|                                                                                                                                                                                                                      |                                                                                                               |                                 |                           |
|----------------------------------------------------------------------------------------------------------------------------------------------------------------------------------------------------------------------|---------------------------------------------------------------------------------------------------------------|---------------------------------|---------------------------|
| The number of medicines that a patient has been prescribed for regular use when discharged from hospital                                                                                                             |                                                                                                               |                                 |                           |
| <b>Number of prescribed medicines for when required use at discharge</b><br><br>The number of medicines that a patient has been prescribed for when required use when discharged from hospital                       | Site Medical Record                                                                                           | Once, at the point of discharge | Routine hospital data     |
| <b>Number of prescribed medicines that are stopped</b><br><br>The number of medicines that have been discontinued during study window AND while patient is on study ward                                             | Site Medical Record                                                                                           | Once, at the point of discharge | Routine hospital data     |
| <b>Number of prescribed medicines with dosage reduced</b><br><br>The number of medicines which have had the dosage reduced during study window AND while patient is on study ward                                    | Site Medical Record                                                                                           | Once, at the point of discharge | Routine hospital data     |
| <b>Number of stopped medicines that are re-started</b><br><br>The number of medicines that were discontinued during study window AND while patient is on study ward that are subsequently restarted during follow-up | Community pharmacy dispensed medicines submitted to NHS Business Services Authority, dataset from NHS Digital | Once at 90 days post discharge  | Routine primary care data |

\*Office for National Statistics (UK agency responsible for collecting and publishing **related to the economy, population and society at national, regional and local levels**) and Hospital Episode Statistics (a database containing details about admissions, A&E attendances and outpatient appointments at NHS hospitals).
