# Supplementary material for: CompreHensive geriAtRician-led MEdication Review (CHARMER): protocol for a feasibility study of a hospital deprescribing behaviour change intervention
Source: HighWire-hosted journal article supplement (doi:10.1136/bmjopen-2023-075795), 2023-08-01
Supplement: bmjopen-2023-075795supp004_data_supplement.pdf [file bmjopen-2023-075795supp004_data_supplement.pdf]

## Document 30

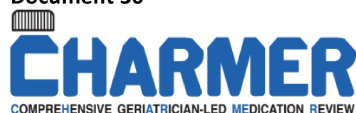

NHS Trust Header

**Mechanism of Action (MoA) questionnaire**

Participant ID:

Baseline/Follow-up (delete as appropriate)

1. I have the knowledge I need to enable me to make the right deprescribing decision/recommendations for my patients' medication.

| Strongly disagree        | Disagree                 | Neither agree nor disagree | Agree                    | Strongly agree           |
|--------------------------|--------------------------|----------------------------|--------------------------|--------------------------|
| <input type="checkbox"/> | <input type="checkbox"/> | <input type="checkbox"/>   | <input type="checkbox"/> | <input type="checkbox"/> |

2. Proactive deprescribing has more advantages than disadvantages

| Strongly disagree        | Disagree                 | Neither agree nor disagree | Agree                    | Strongly agree           |
|--------------------------|--------------------------|----------------------------|--------------------------|--------------------------|
| <input type="checkbox"/> | <input type="checkbox"/> | <input type="checkbox"/>   | <input type="checkbox"/> | <input type="checkbox"/> |

3. I feel confident that I could make the right deprescribing decision/recommendations for my patients' medication.

| Strongly disagree        | Disagree                 | Neither agree nor disagree | Agree                    | Strongly agree           |
|--------------------------|--------------------------|----------------------------|--------------------------|--------------------------|
| <input type="checkbox"/> | <input type="checkbox"/> | <input type="checkbox"/>   | <input type="checkbox"/> | <input type="checkbox"/> |

4. Proactive deprescribing is a clinical practice that is accepted by patients and carers

| Strongly disagree        | Disagree                 | Neither agree nor disagree | Agree                    | Strongly agree           |
|--------------------------|--------------------------|----------------------------|--------------------------|--------------------------|
| <input type="checkbox"/> | <input type="checkbox"/> | <input type="checkbox"/>   | <input type="checkbox"/> | <input type="checkbox"/> |

5. I have the skills I need to enable me to have effective consultations with patients and/or their carers about proactive deprescribing of their medication.

| Strongly disagree        | Disagree                 | Neither agree nor disagree | Agree                    | Strongly agree           |
|--------------------------|--------------------------|----------------------------|--------------------------|--------------------------|
| <input type="checkbox"/> | <input type="checkbox"/> | <input type="checkbox"/>   | <input type="checkbox"/> | <input type="checkbox"/> |

6. If I did proactively deprescribe or recommend proactive deprescribing I would worry about it after.

| Strongly disagree        | Disagree                 | Neither agree nor disagree | Agree                    | Strongly agree           |
|--------------------------|--------------------------|----------------------------|--------------------------|--------------------------|
| <input type="checkbox"/> | <input type="checkbox"/> | <input type="checkbox"/>   | <input type="checkbox"/> | <input type="checkbox"/> |

## Document 30



NHS Trust Header

7. Marking proactive deprescribing decisions and/or recommendations is consistent with what is expected of my role.

| Strongly disagree        | Disagree                 | Neither agree nor disagree | Agree                    | Strongly agree           |
|--------------------------|--------------------------|----------------------------|--------------------------|--------------------------|
| <input type="checkbox"/> | <input type="checkbox"/> | <input type="checkbox"/>   | <input type="checkbox"/> | <input type="checkbox"/> |

8. I can actively support deprescribing within my regular workload

| Strongly disagree        | Disagree                 | Neither agree nor disagree | Agree                    | Strongly agree           |
|--------------------------|--------------------------|----------------------------|--------------------------|--------------------------|
| <input type="checkbox"/> | <input type="checkbox"/> | <input type="checkbox"/>   | <input type="checkbox"/> | <input type="checkbox"/> |

9. My trust has a clear policy for deprescribing

| Strongly disagree        | Disagree                 | Neither agree nor disagree | Agree                    | Strongly agree           |
|--------------------------|--------------------------|----------------------------|--------------------------|--------------------------|
| <input type="checkbox"/> | <input type="checkbox"/> | <input type="checkbox"/>   | <input type="checkbox"/> | <input type="checkbox"/> |

10. My department has a clear policy for deprescribing

| Strongly disagree        | Disagree                 | Neither agree nor disagree | Agree                    | Strongly agree           |
|--------------------------|--------------------------|----------------------------|--------------------------|--------------------------|
| <input type="checkbox"/> | <input type="checkbox"/> | <input type="checkbox"/>   | <input type="checkbox"/> | <input type="checkbox"/> |

11. I feel that deprescribing efforts in my trust are noticed

| Strongly disagree        | Disagree                 | Neither agree nor disagree | Agree                    | Strongly agree           |
|--------------------------|--------------------------|----------------------------|--------------------------|--------------------------|
| <input type="checkbox"/> | <input type="checkbox"/> | <input type="checkbox"/>   | <input type="checkbox"/> | <input type="checkbox"/> |
